# Supplementary material for: Pluteus insidiosus Complex, Four New Species Described and Pluteus reisneri Resurrected
Source: MDPI journal article supplement (doi:10.3390/jof8060623), 2022-06-10
Supplement: s1 [file s1]

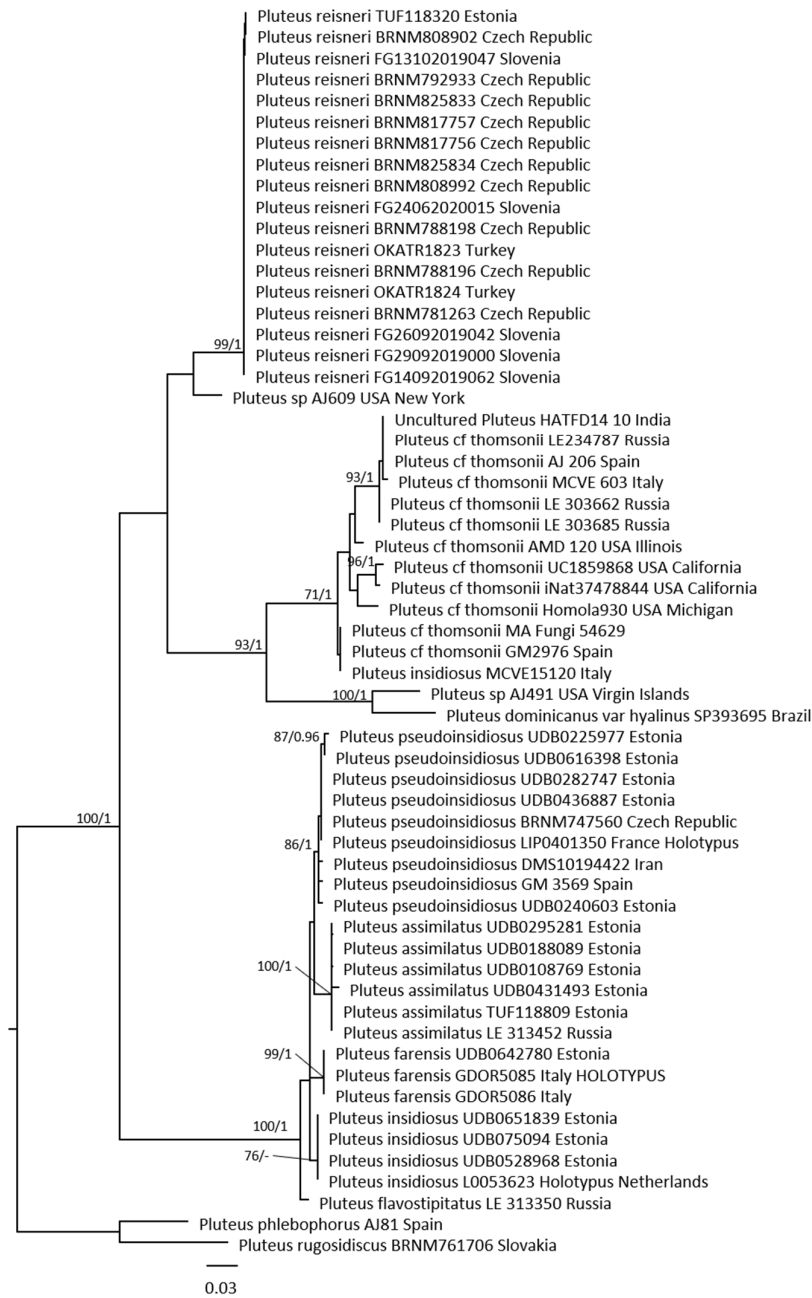

**Figure S1.** Best tree from the ML analysis of the 5.8S+nrITS2+TEF1- $\alpha$ -exone dataset. Bootstrap values  $\geq 70\%$  and posterior probabilities  $\geq 0.90$  are indicated on or below the branches.
